# Supplementary material for: Global identification of mammalian host and nested gene pairs reveal tissue-specific transcriptional interplay
Source: HighWire-hosted journal article supplement (doi:10.1101/gr.279430.124), 2024-11-22
Supplement: Supplemental_information.pdf [file Supplemental_information.pdf]

A

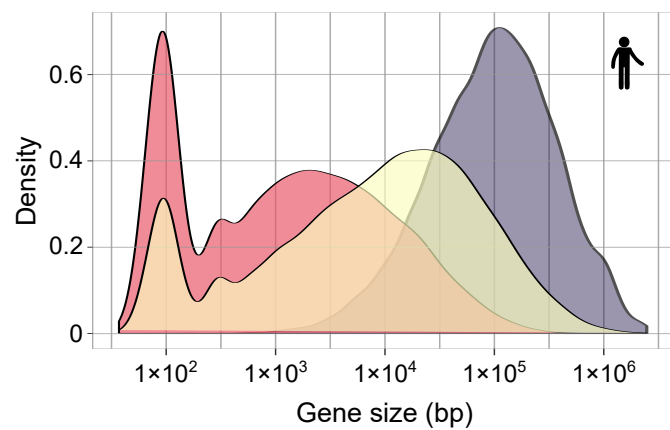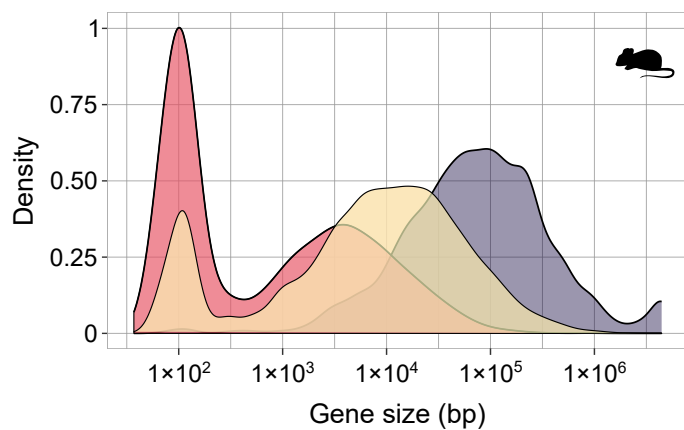

B

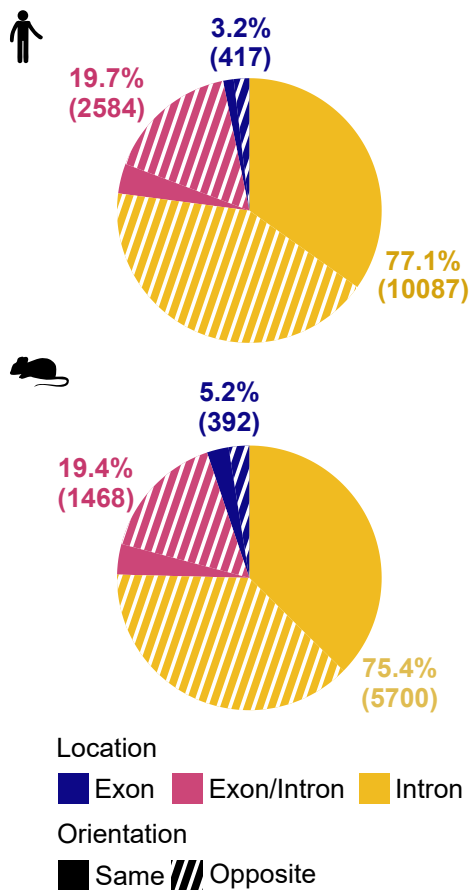

D

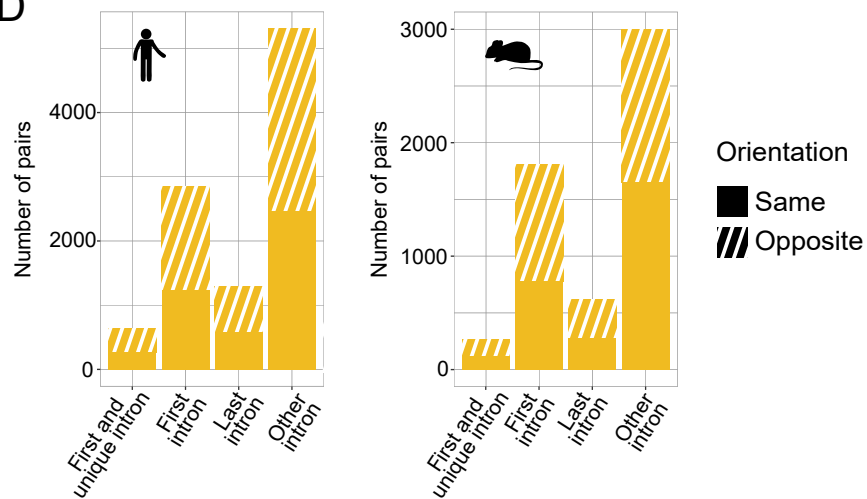

E

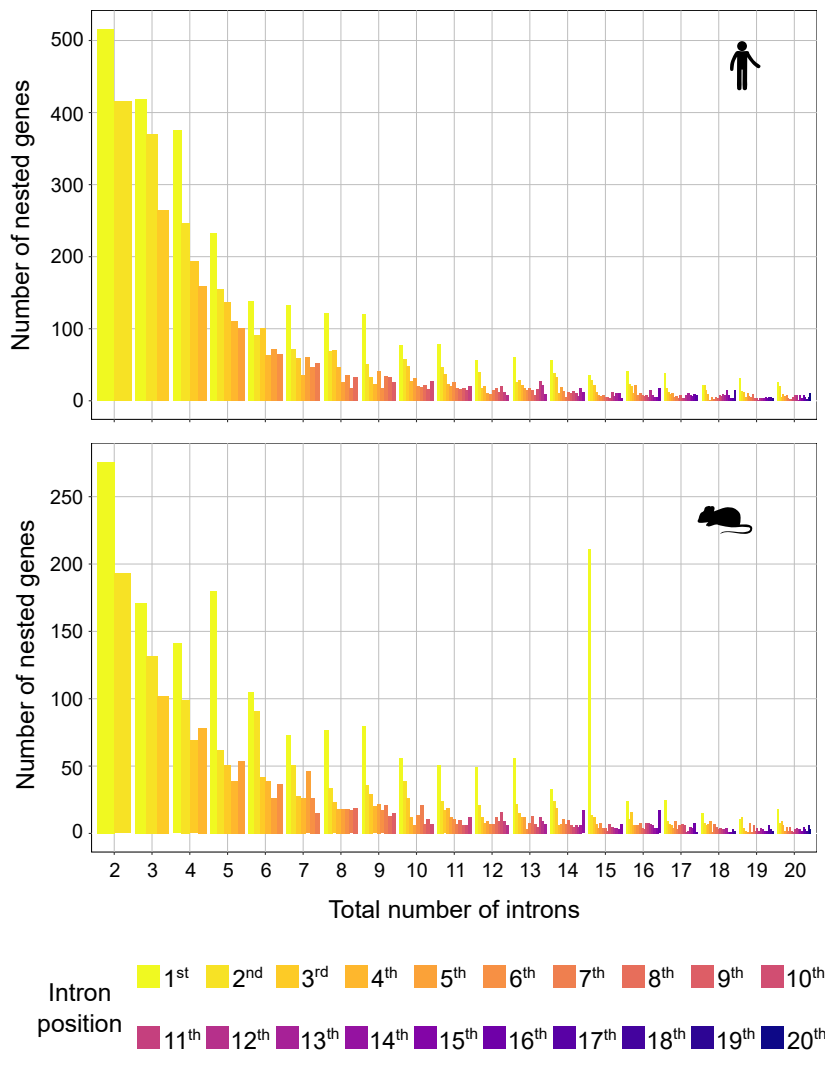

C

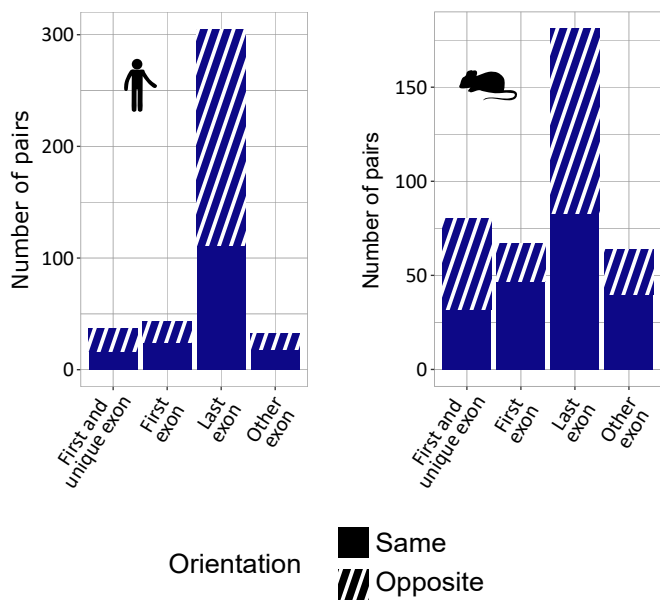

**Supplementary Figure 1. Host/nested genes pairs in mouse and human shows similar characteristics.** (A) Distribution of the genes' size for host genes, nested genes, and all genes. A base-10 log scale was used for the gene size. (B) Distribution of the locations of nested genes within their host genes according to their orientation to each other. (C) Detailed location of the nested genes when fully contained inside an exon. (D) Detailed location of the nested genes when fully contained inside an intron. (E) Total number of nested genes within the intron of their host gene relative to their 5'>3' position. This was performed for host genes containing 2-20 introns.



A

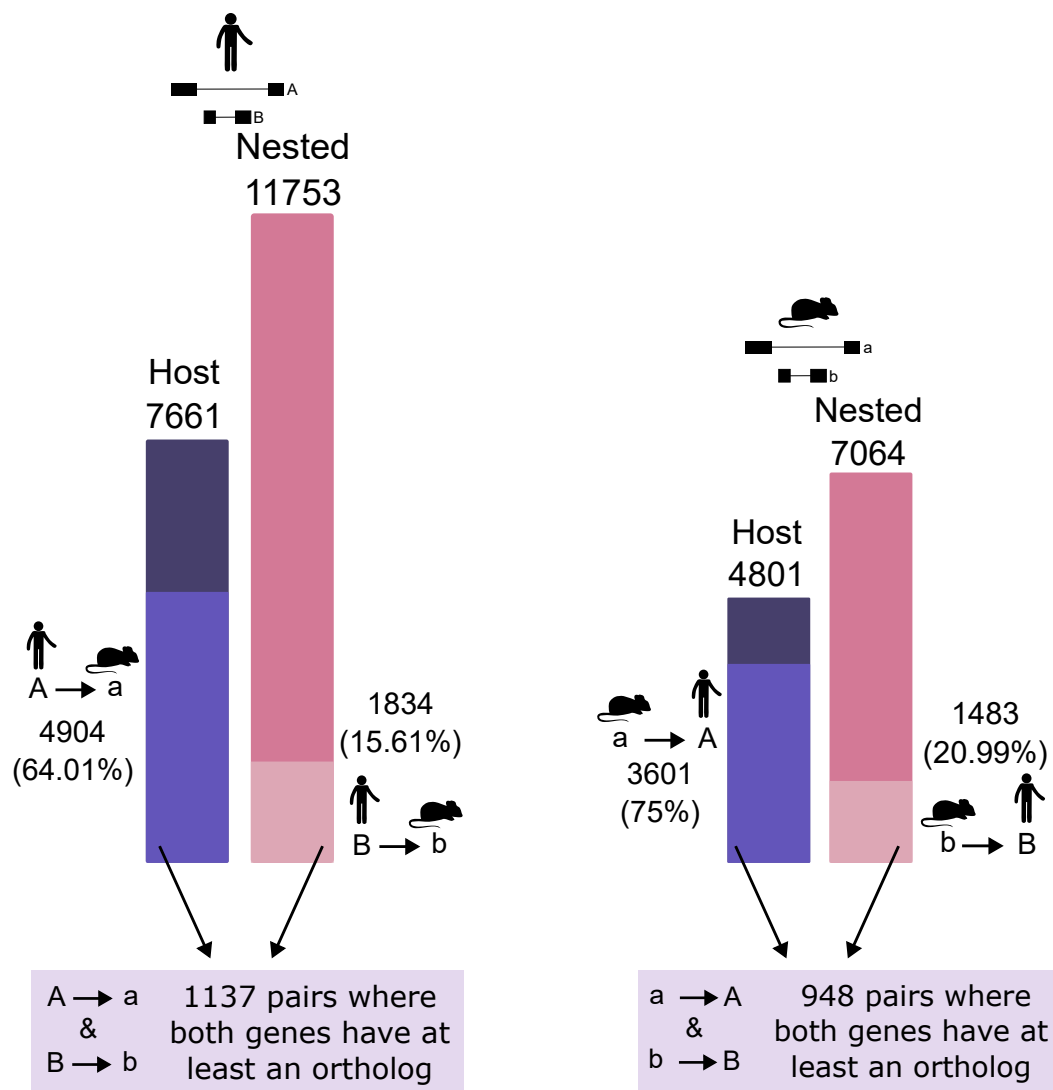

B

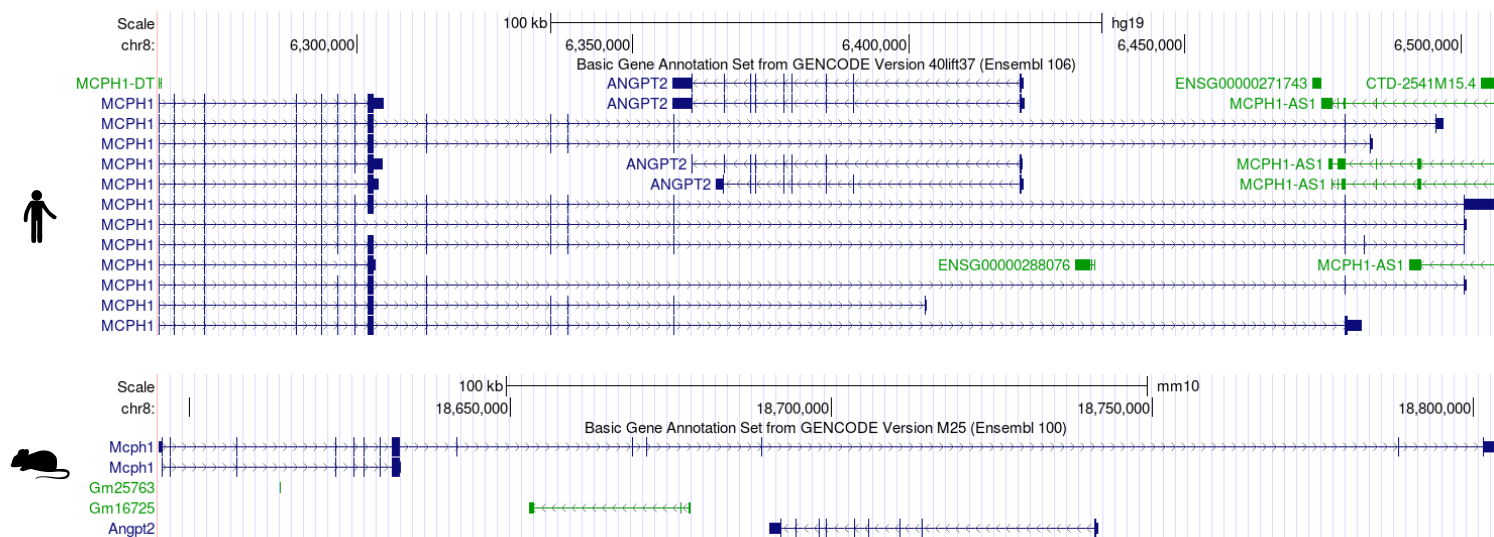

**Supplementary Figure 2. Conservation of host and nested gene pairs between human and mouse genomes.** (A) Host and nested gene conservation between mouse and human genomes. (B) Screenshots of the UCSC genome browser for an example of a host/nested genes pair conserved between mouse and human.

A

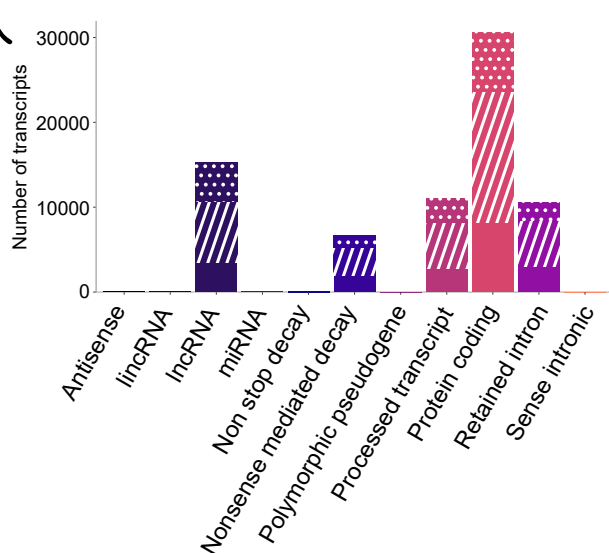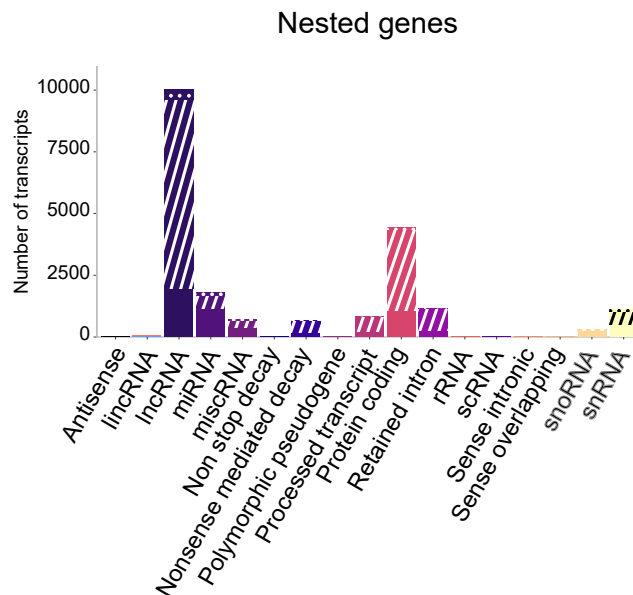

Orientation

Same

Opposite

Both

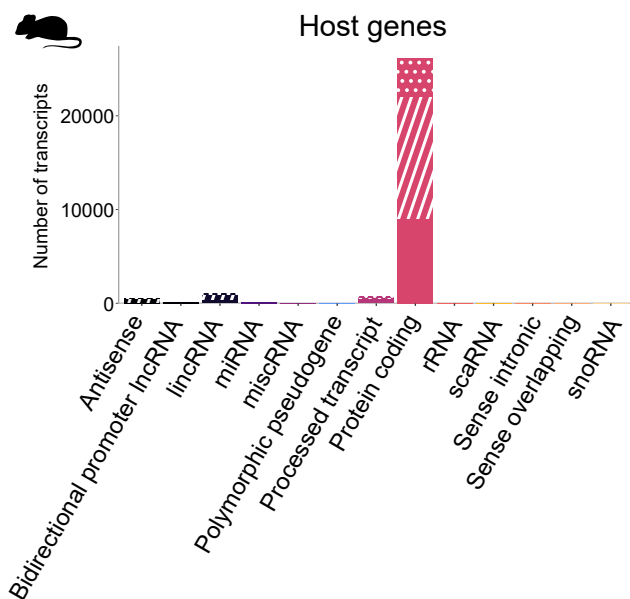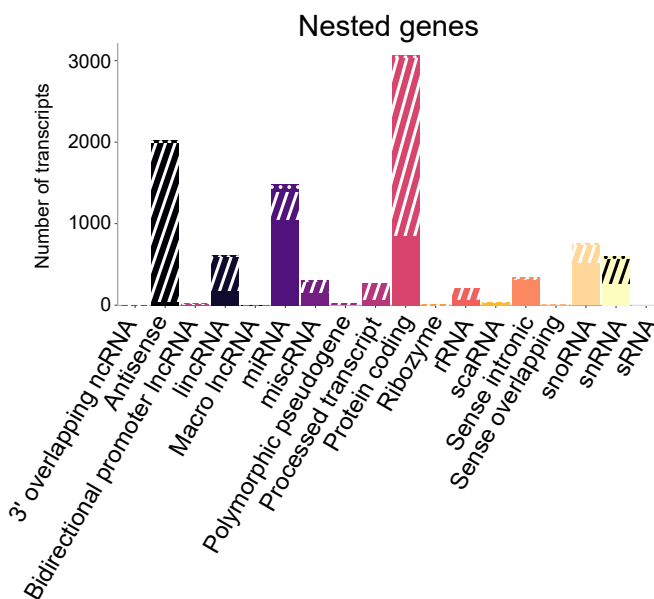

B

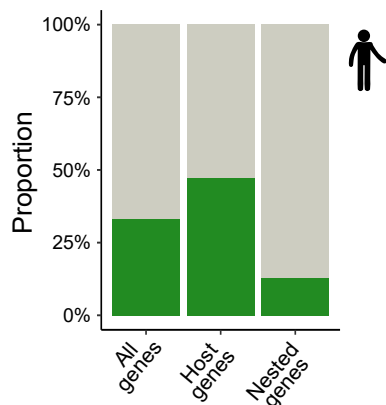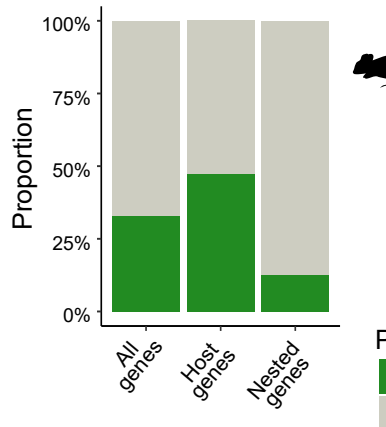

C

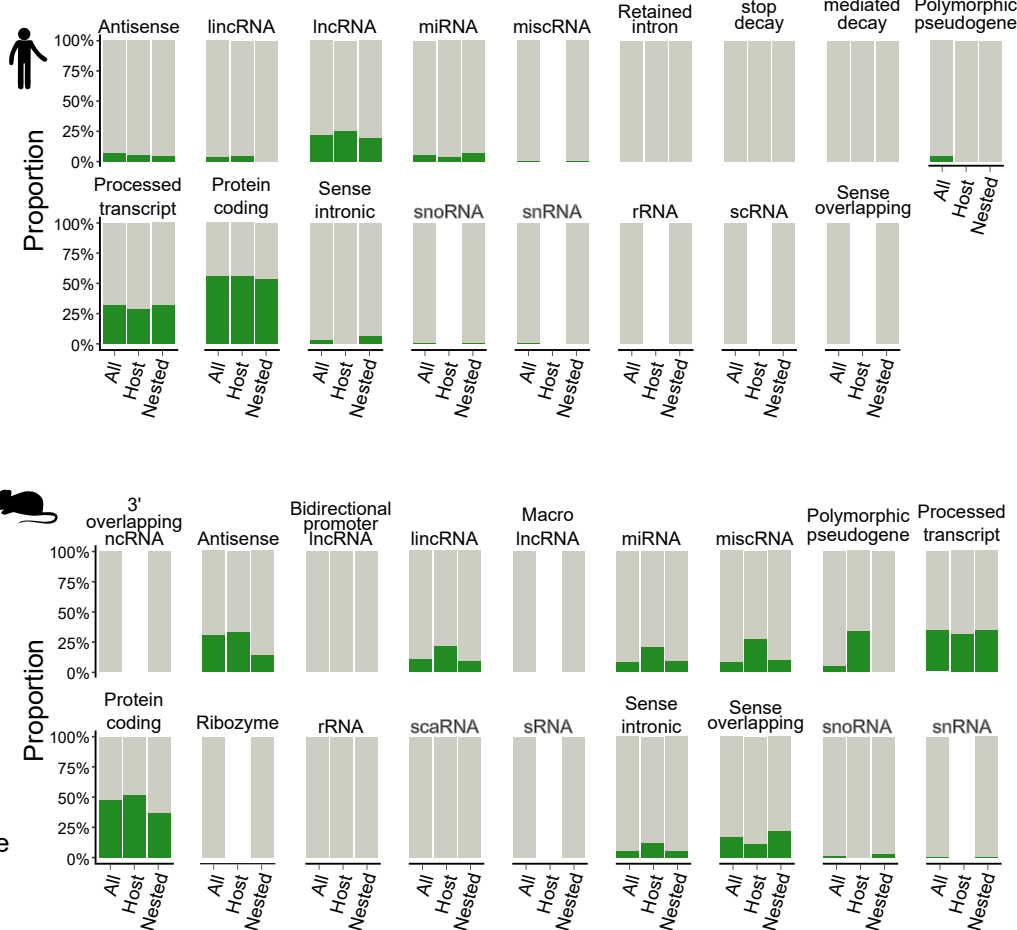

**Supplementary Figure 3. Host/nested genes pair's biotypes, functional enrichment analysis and expression dispersion.** (A) Number of host and nested genes associated with each biotype according to their orientation in pairs. Both refers to genes involved in multiple pairs with different relative orientation. (B) Proportion of host, nested and all genes that are associated with a CpG island (CGI) promoter. (C) Proportion of host, nested and all gene transcripts that are associated with a CGI promoter across all biotypes examined.

A

## Host genes

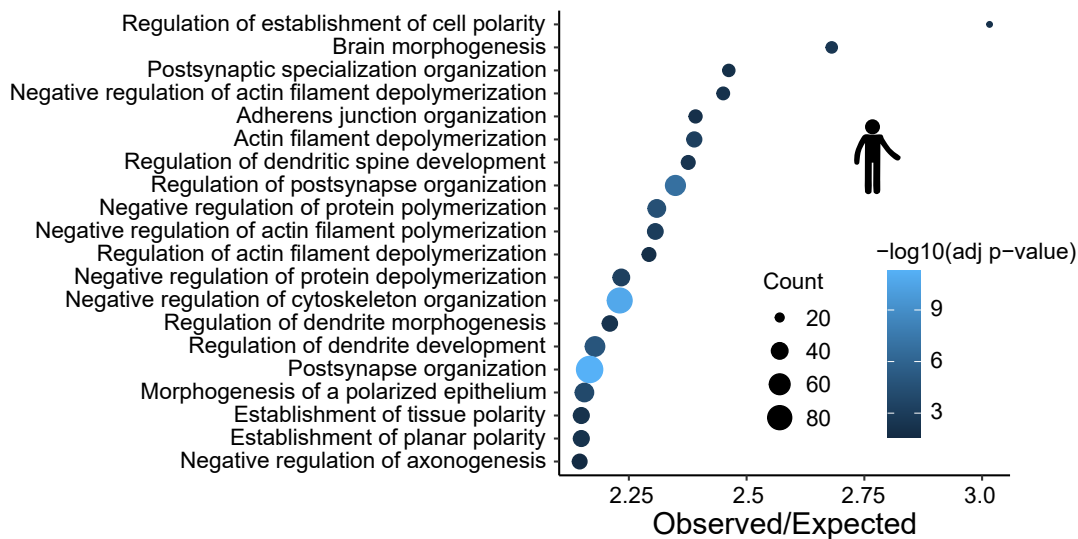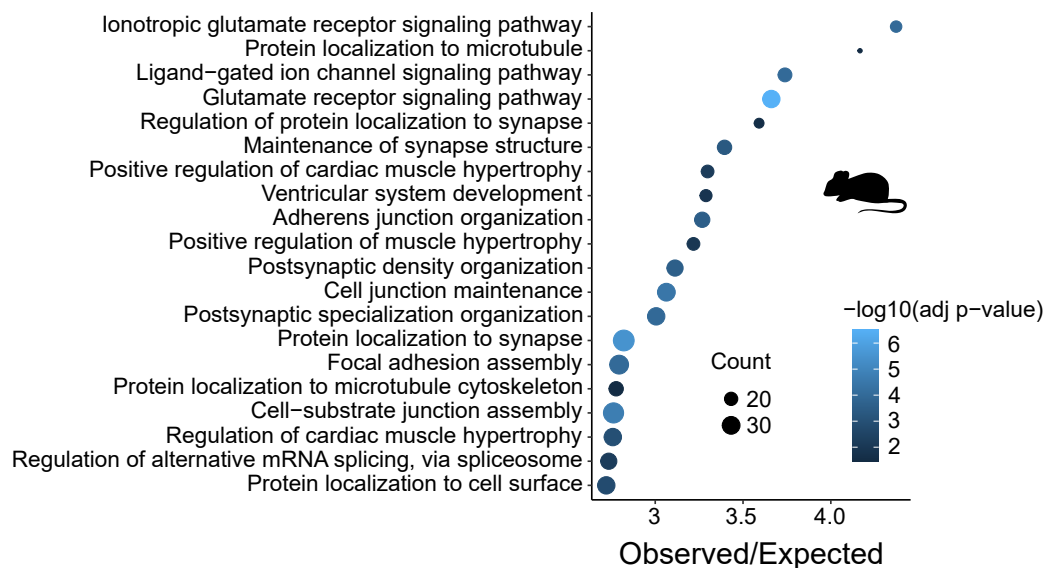

B

## Nested genes

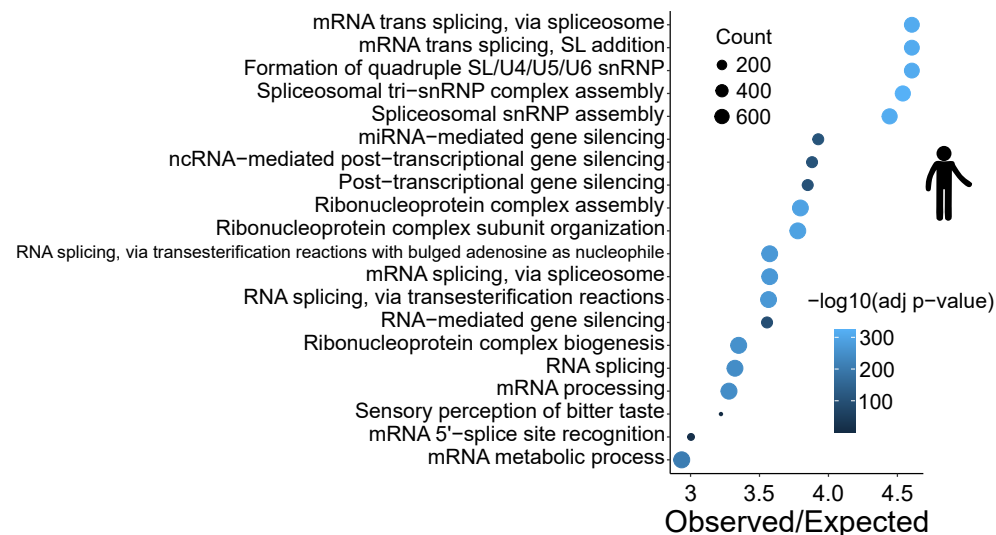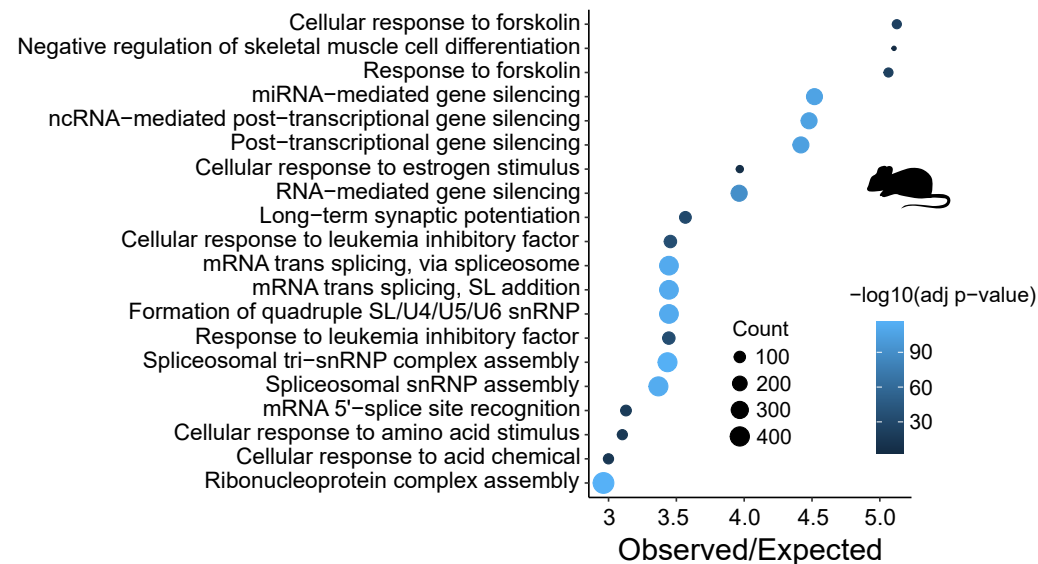

**Supplementary Figure 4. Host/nested gene pairs functional enrichment analysis.** (A) Gene sets enrichment analysis for host gene lists. Only the top 20 (according to the observed/expected ratio) significant biological processes are represented. (B) Same for nested genes.

A

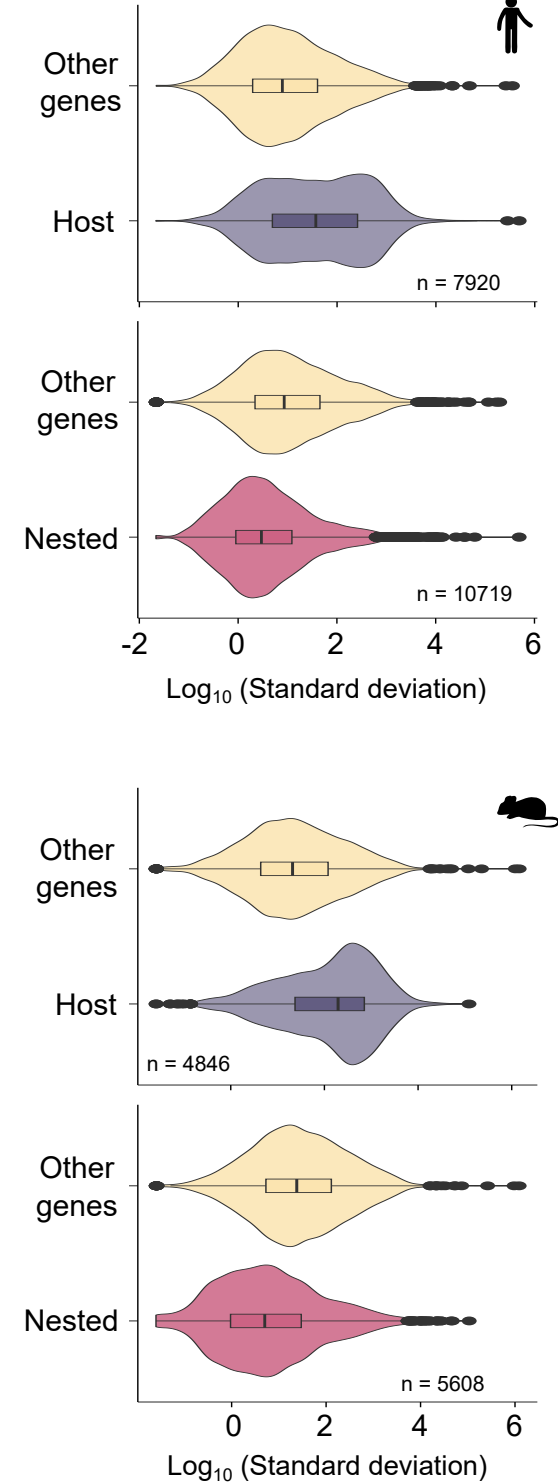

B

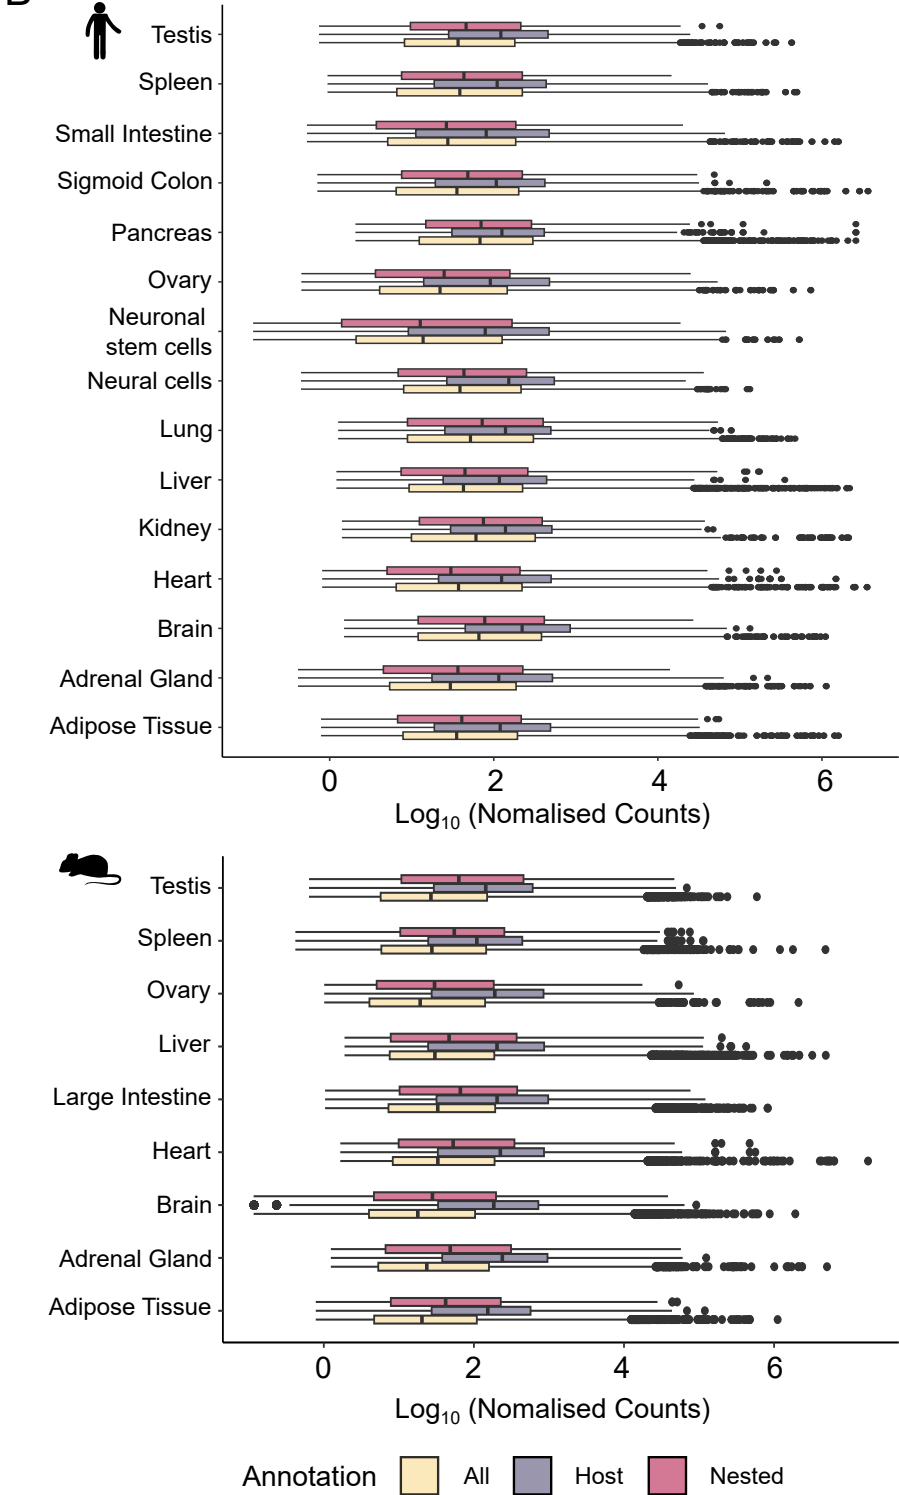

C

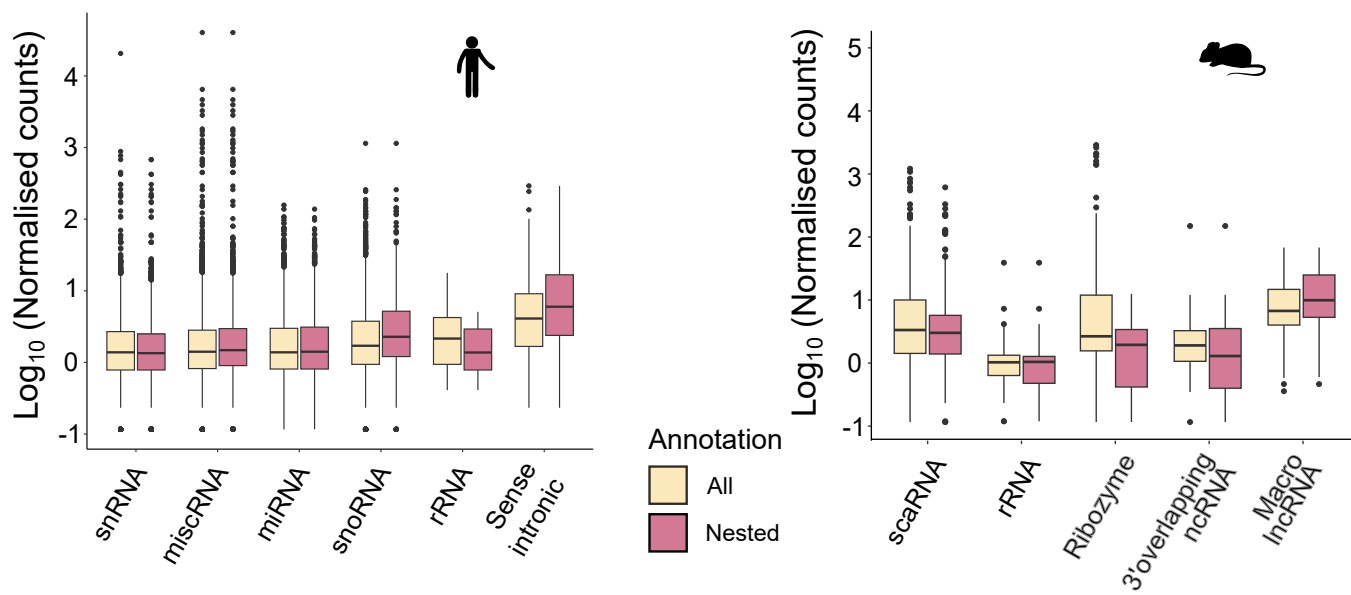

**Supplementary Figure 5. Distribution of the expression of host/nested genes in ENCODE RNA sequencing datasets.** (A) Distribution of standard deviation between the normalized counts across tissues Across 1000 matched size random samples, application of a Kolmogorov–Smirnov test to these distributions always resulted in a  $p < 0.05$ . The figure shows one representative matched sample comparison. (B) Distribution of the expression of all, host and nested genes for protein coding genes across tissues, in human and mouse transcriptomes (C) Distribution of the expression of all and nested genes for biotypes unique to nested genes, in human and mouse transcriptomes.



A

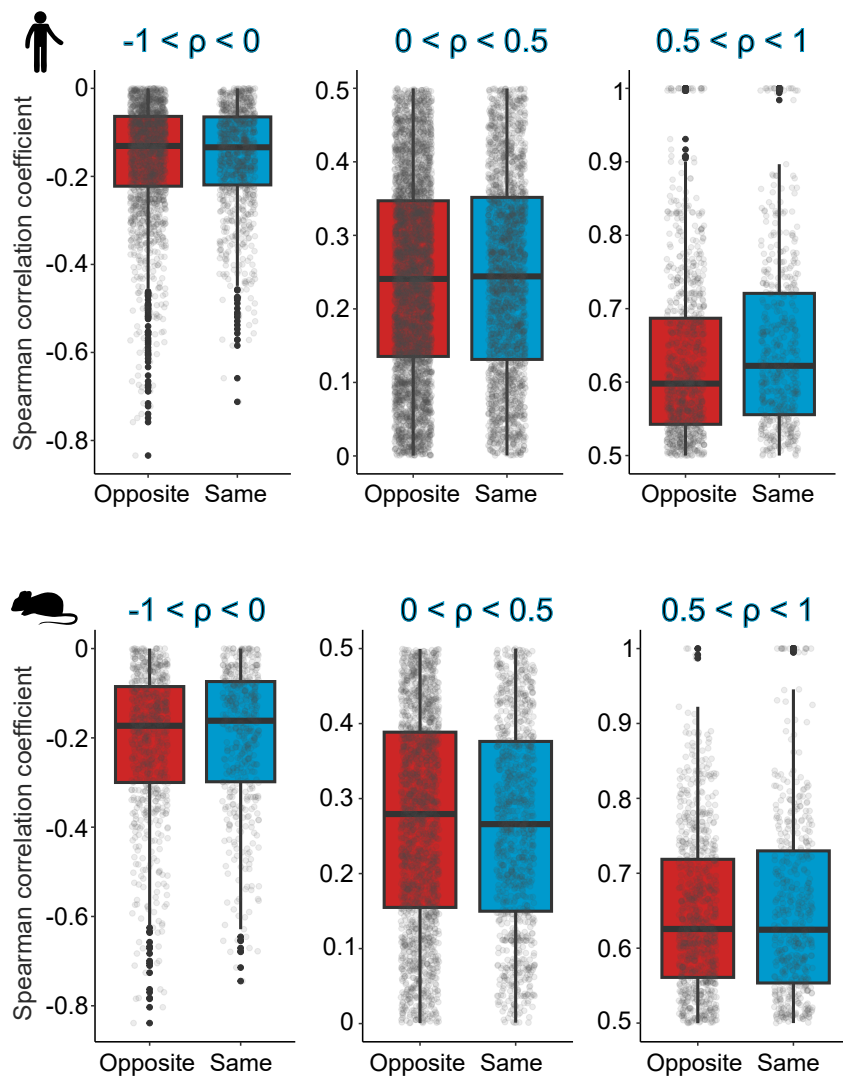

B

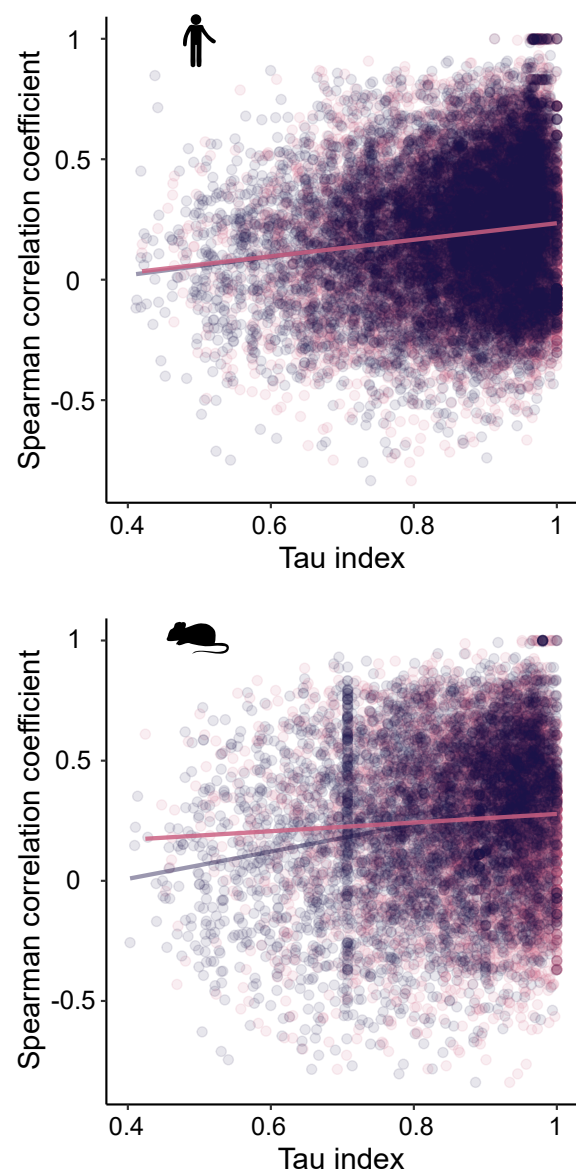

C

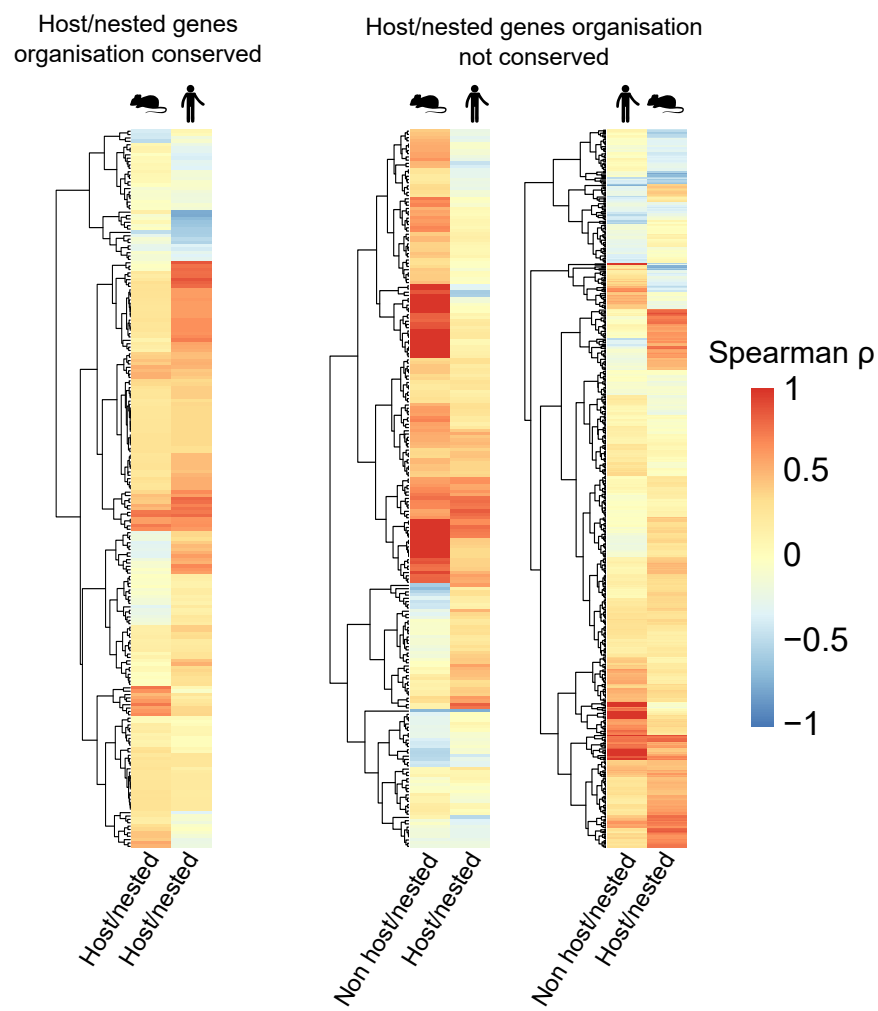

D

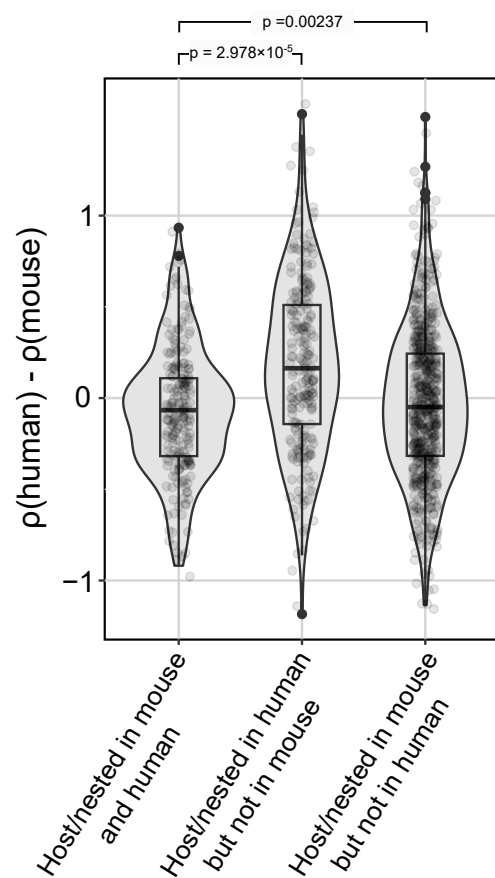

**Supplementary Figure 6. Expression correlation between host and nested genes and its association with tissue specificity and conservation.** (A) Distribution of Spearman's rank correlation coefficient between pairs according to their orientation and depending on the range of  $\rho$ . (B) Correlation between the  $\tau$  index and Spearman's rank correlation coefficient across all host nested gene pairs. (C) Heatmap showing  $\rho$  between conserved host/nested gene pairs and then, between pairs of genes that were conserved but were only host/nested in one species. (D) Difference in  $\rho$  between human and mouse, for conserved host/nested gene pairs and then, between pairs of genes that were conserved but were only host/nested in one species. Levene Test was used to determine differences in variance across the values, p-values indicated above the graph.

**A**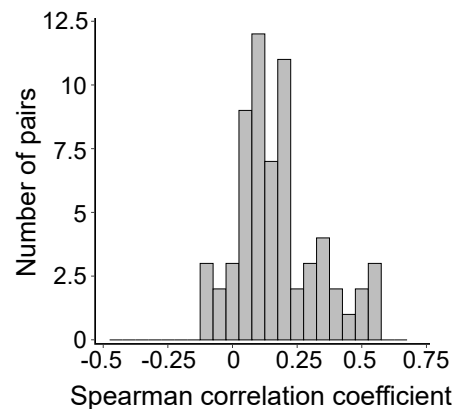**B**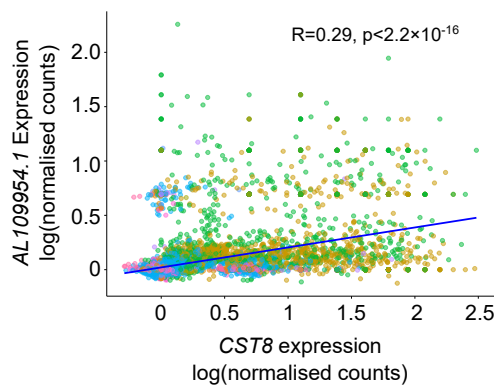**C**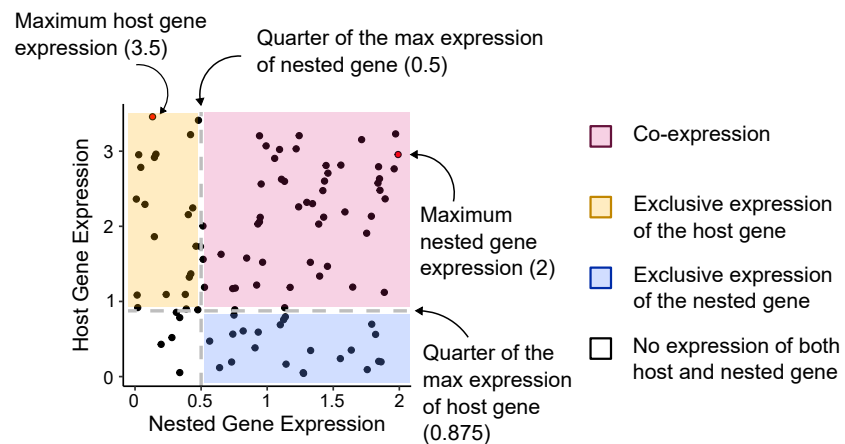**D**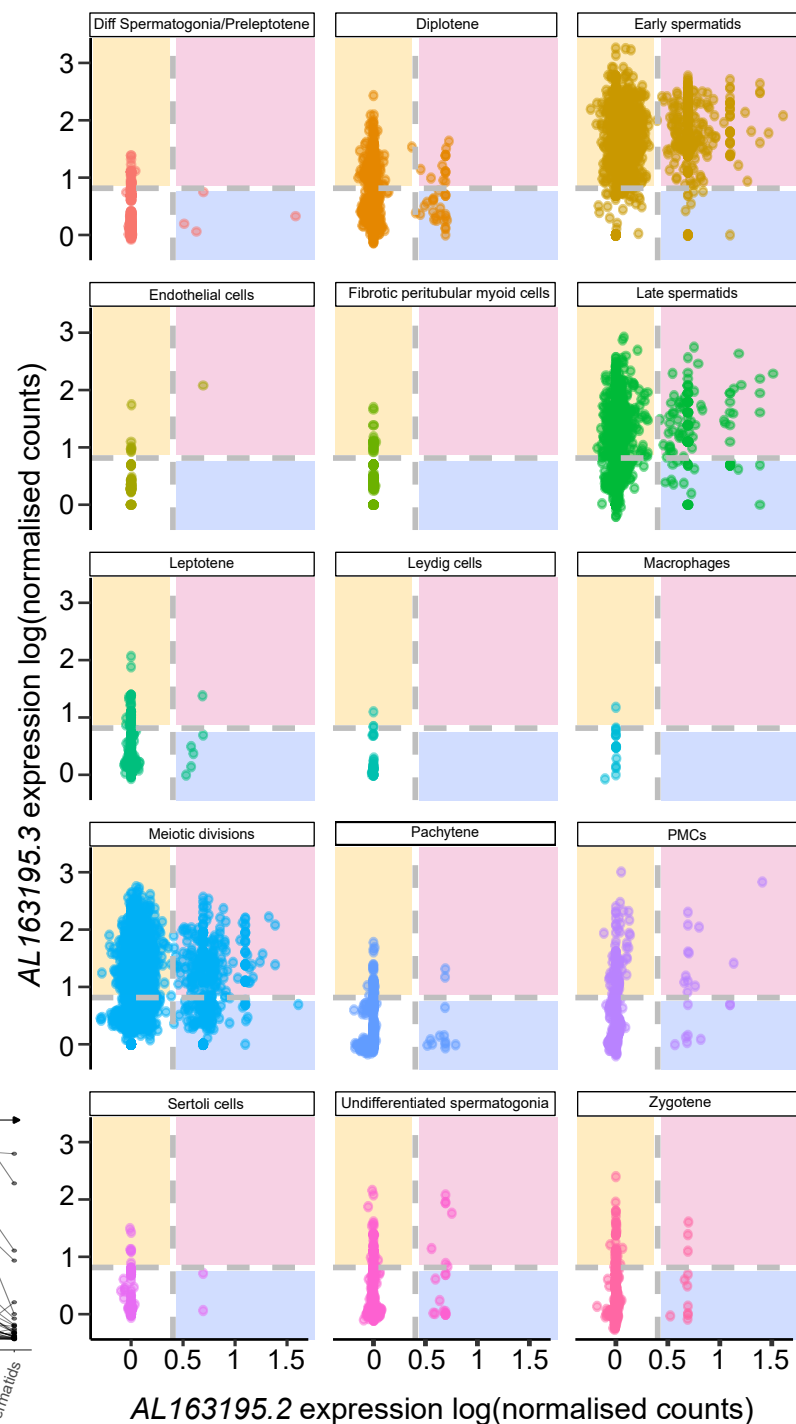**E**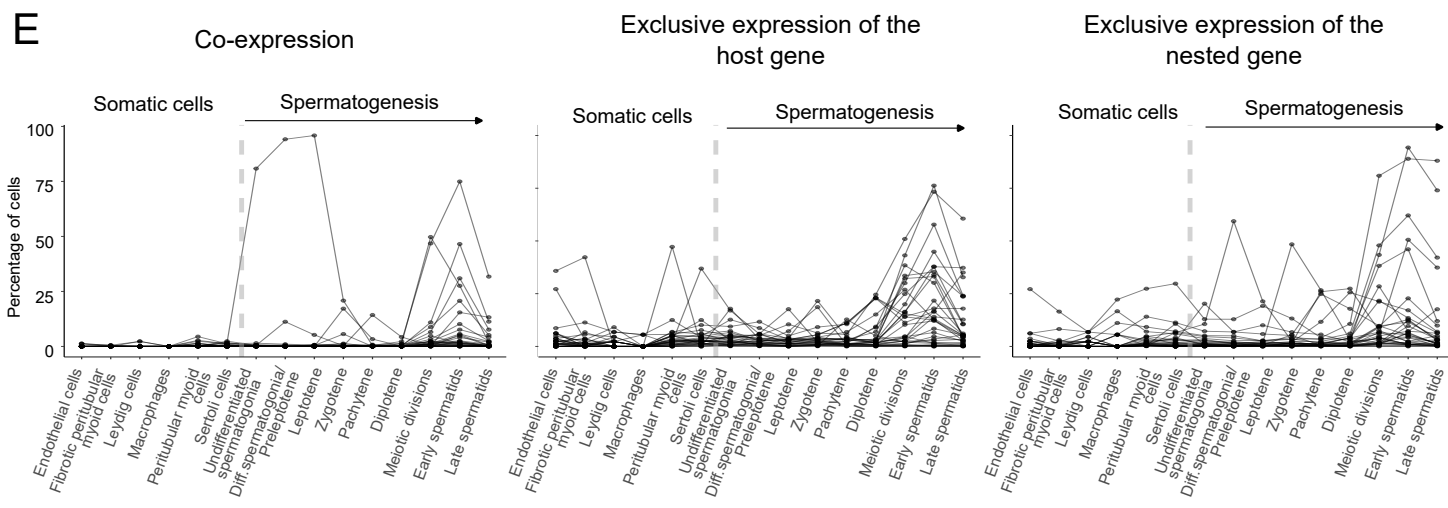

AL163195.2 expression log(normalised counts)

**Supplementary Figure 7. Host and nested genes with high coexpression in testis can exhibit dynamic coexpression patterns during spermatogenesis.** (A) Distribution of the Spearman's rank correlation coefficient values between expression of the host and nested genes across testis single cells (B) Scatter plots showing examples of host and nested gene expression and Spearman's rank correlation across single cells in testis for *AL109954.1/CST8*,  $R=0.29$  and *RNASE11/AL163195.2*  $R=0.25$  (C) Schematic representation of the filtering methodology applied to single cells to determine proportion of cells which co-express a host and nested gene pair, or only express one of the partner. In this randomised mock example, host (0.875) and nested (0.5) gene expression thresholds were used to calculate that 46% of single cells co-express the gene pair. (D) Scatter plots showing examples of host and nested genes coexpression in the different testis cell types for the pair *AL163195.3/AL163195.2* (E) Percentage of cells co-expressing host and nested gene pairs or expressing only one of the partners across spermatogenesis for the 34 pairs with tissue specific expression in testis and robust expression data in the scRNA-seq.

A

## Exclusive expression of the host gene

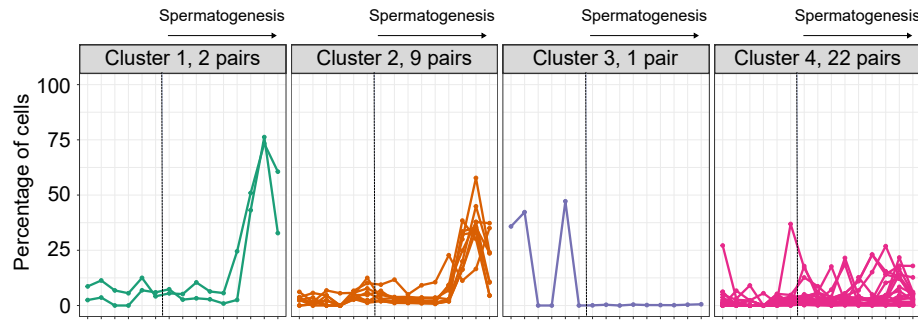

## Exclusive expression of the nested gene

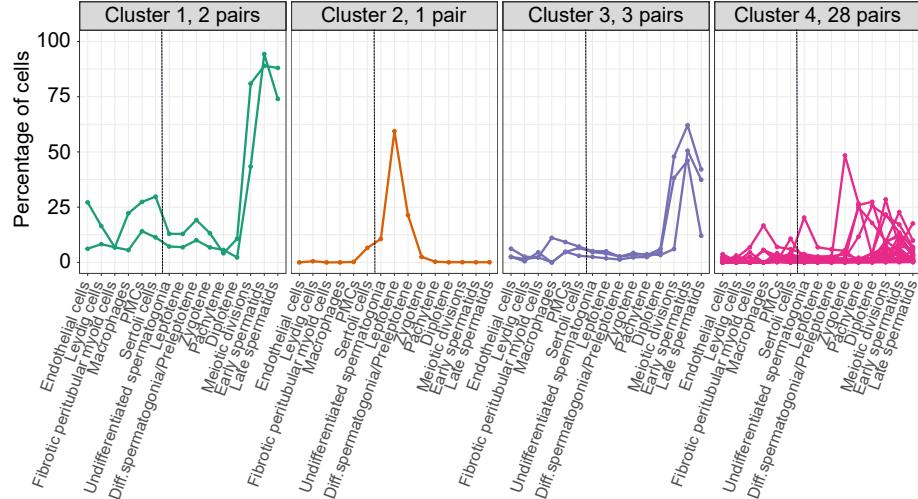

B

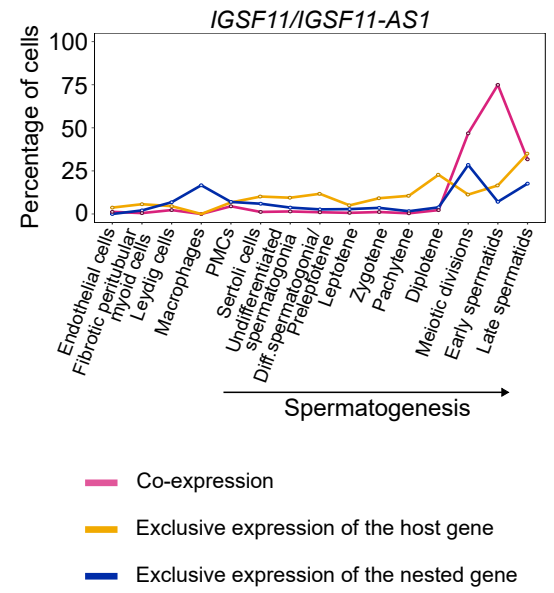

**Supplementary Figure 8. Profiles of host and nested genes expression during spermatogenesis.** (A) Proportion of cells which only express host or nested gene across spermatogenesis. Four distinct coexpression profiles were determined by *k*-means clustering. (B) Line plot showing the profile of expression for the IGSF11/IGSF11-AS1 gene pair calculated using the method detailed in Supplemental\_Fig\_7C.

A

## MGAM - Host gene

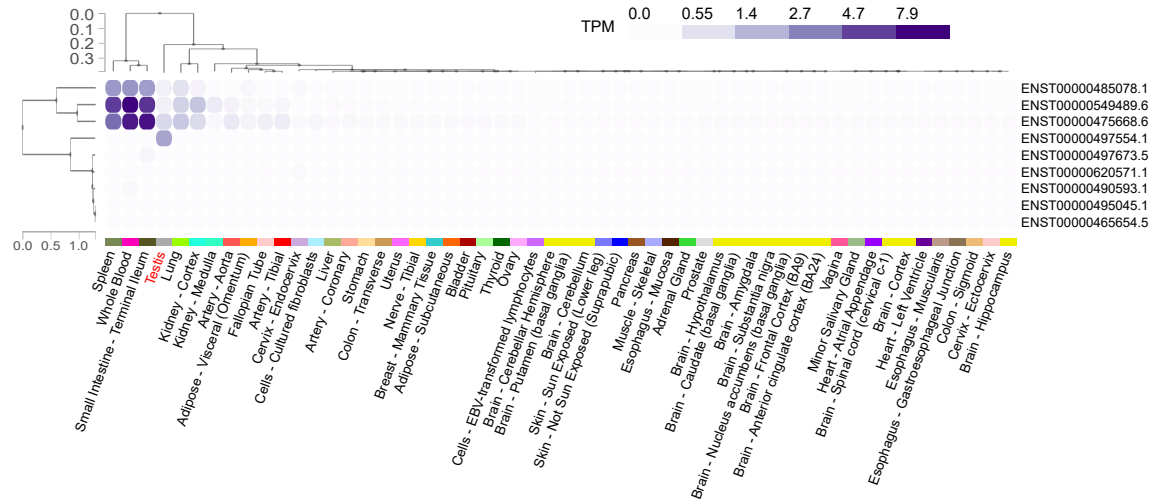

## OR9A4 - Nested gene

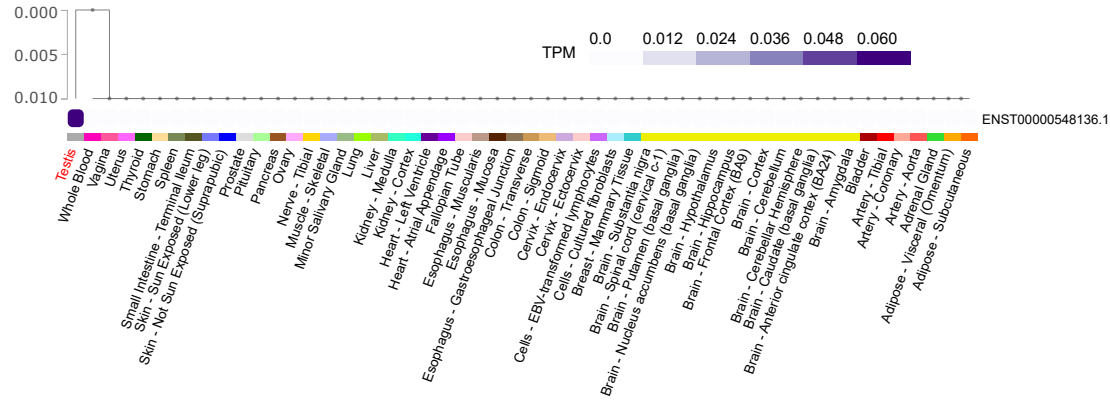

B

## HMX1 - Host gene

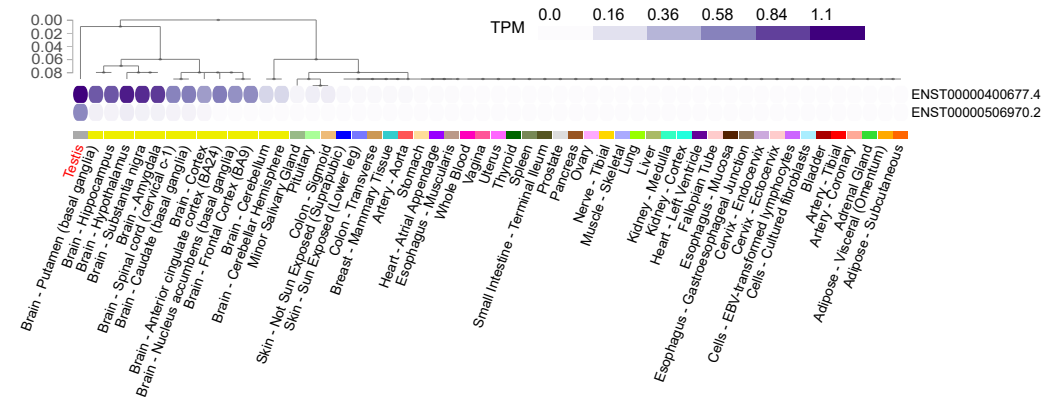

## AC116612.1 - Nested gene

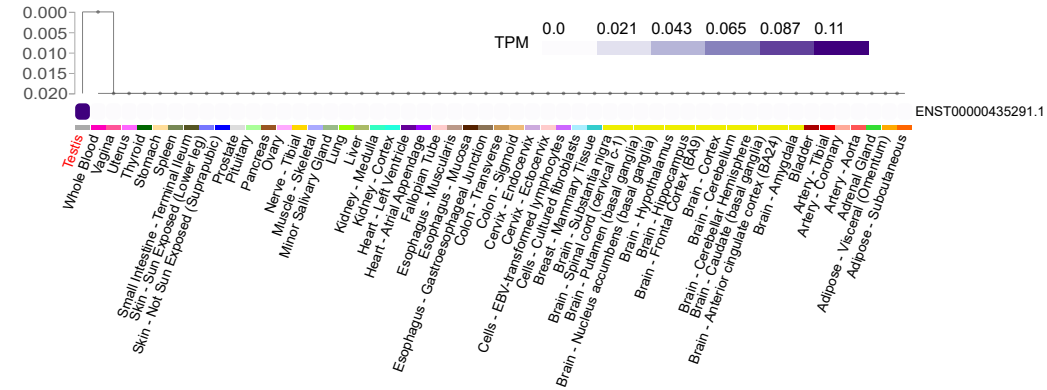

**Supplementary Figure 9. Host and nested genes coexpression is correlated with regulation of isoform diversity.** (A) Profile of expression of the different isoforms (rows) of the *MGAM/OR9A4* pair in different tissues (columns) from the GTEx portal data on isoforms expression (<https://gtexportal.org/home/>). Isoform and tissue were ordered by hierarchical clustering using the Euclidean distance and average linkages. Tissues where coexpression is happening are in red. (B) Profile of expression of the different isoforms (rows) of the *HMX1/AC116612.1* pair in different tissues (columns) from the GTEx portal data on isoforms expression (<https://gtexportal.org/home/>). Isoform and tissue were ordered by hierarchical clustering using the Euclidean distance and average linkages. Tissues where coexpression is happening are in red.



A

## HNF4A - Host gene

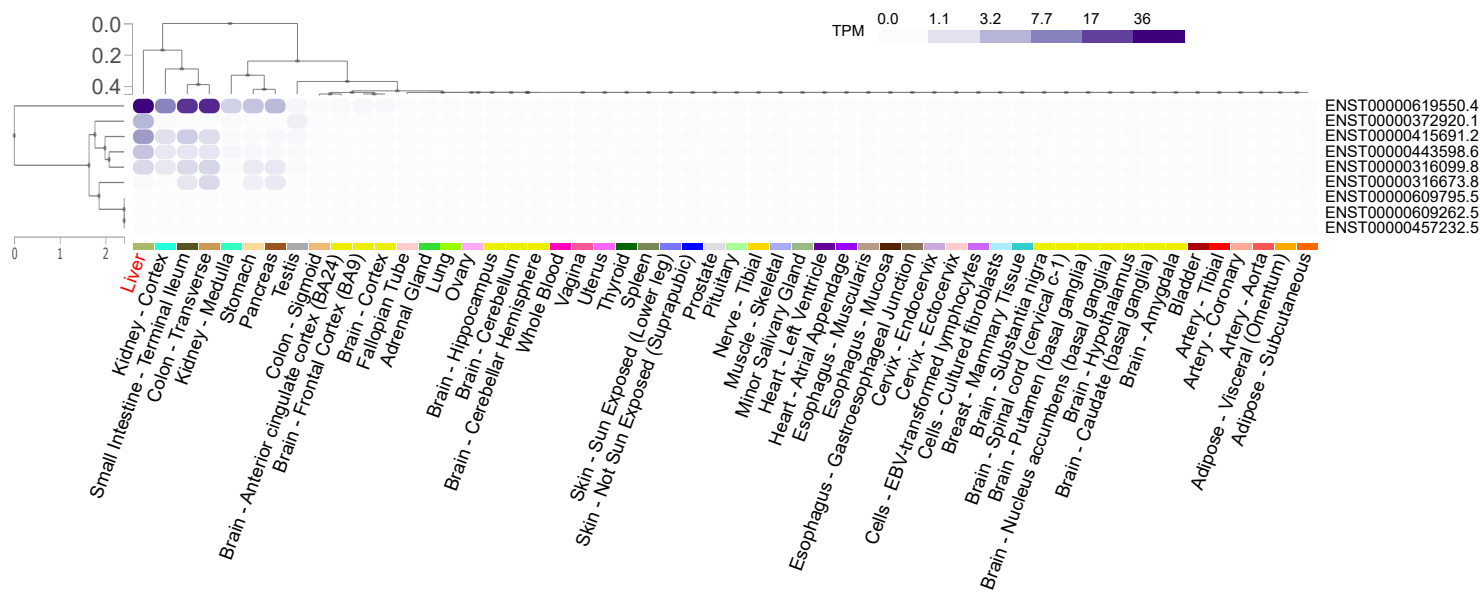

## AL117382.2 - Nested gene

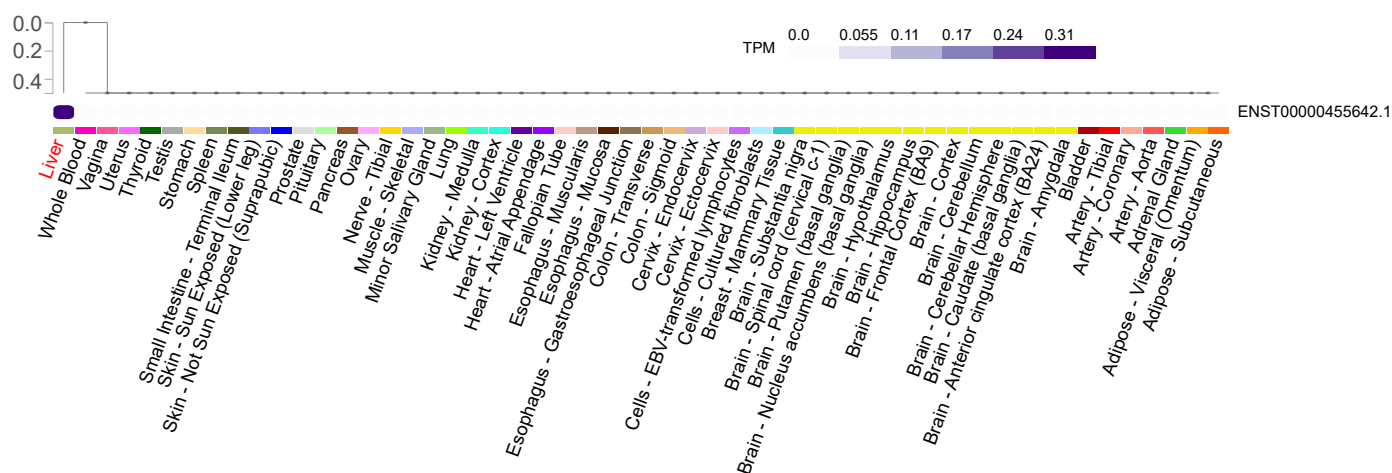

B

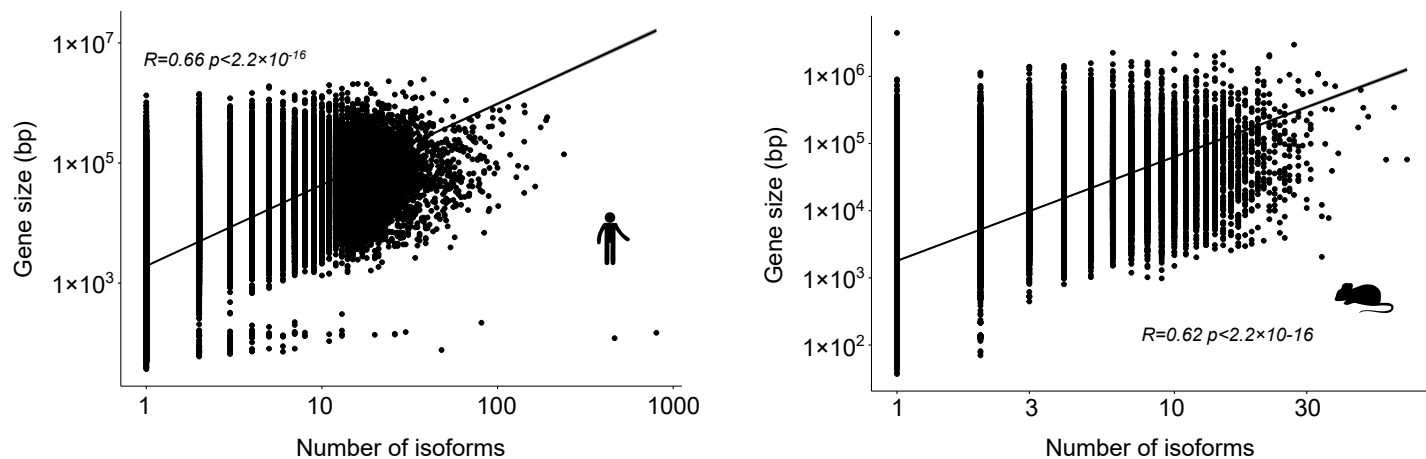

**Supplementary Figure 10. Host genes display a higher number of isoforms.** (A) Profile of expression of the different isoforms (rows) of the *HNF4A/AL117382.2* pair in different tissues (columns) from the GTEx portal data on isoforms expression (<https://gtexportal.org/home/>). Isoform and tissue were ordered by hierarchical clustering using the Euclidean distance and average linkages. Tissues where coexpression is happening are in red. (B) Scatter plot showing the correspondence between the gene size and number of isoforms. A base-10 log scale was used for the number of isoforms and the gene size. The correlation was determined by Spearman's rank correlation.
